# Supplementary material for: Electrochemical synthesis of copper nanoparticles using cuprous oxide as a precursor in choline chloride–urea deep eutectic solvent: nucleation and growth mechanism
Source: Royal Society of Chemistry journal article supplement (doi:10.1039/c4cp03041a), 2014-10-23
Supplement: c4cp03041a1.pdf [file c4cp03041a1.pdf]

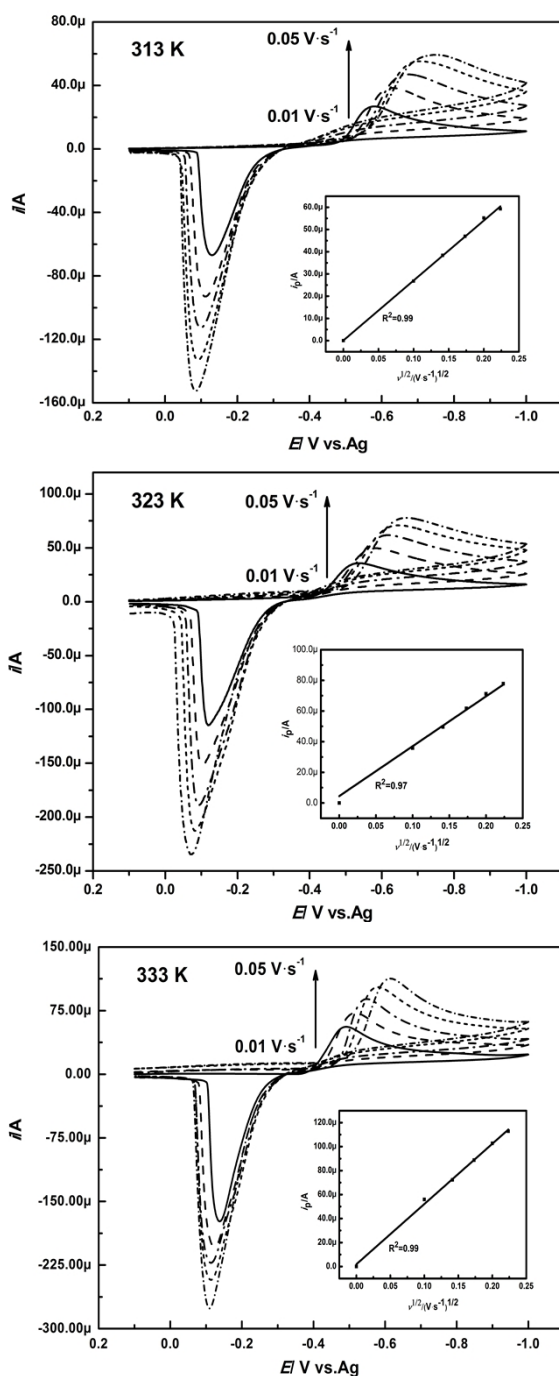

Fig. S1 Comparison of CVs recorded at a nickel electrode for the reduction of the 20 mM Cu(I)/DES at various temperatures with different scan rates (indicated). The inset shows the linear correlations of the cathodic peak current against square root of sweep rate.

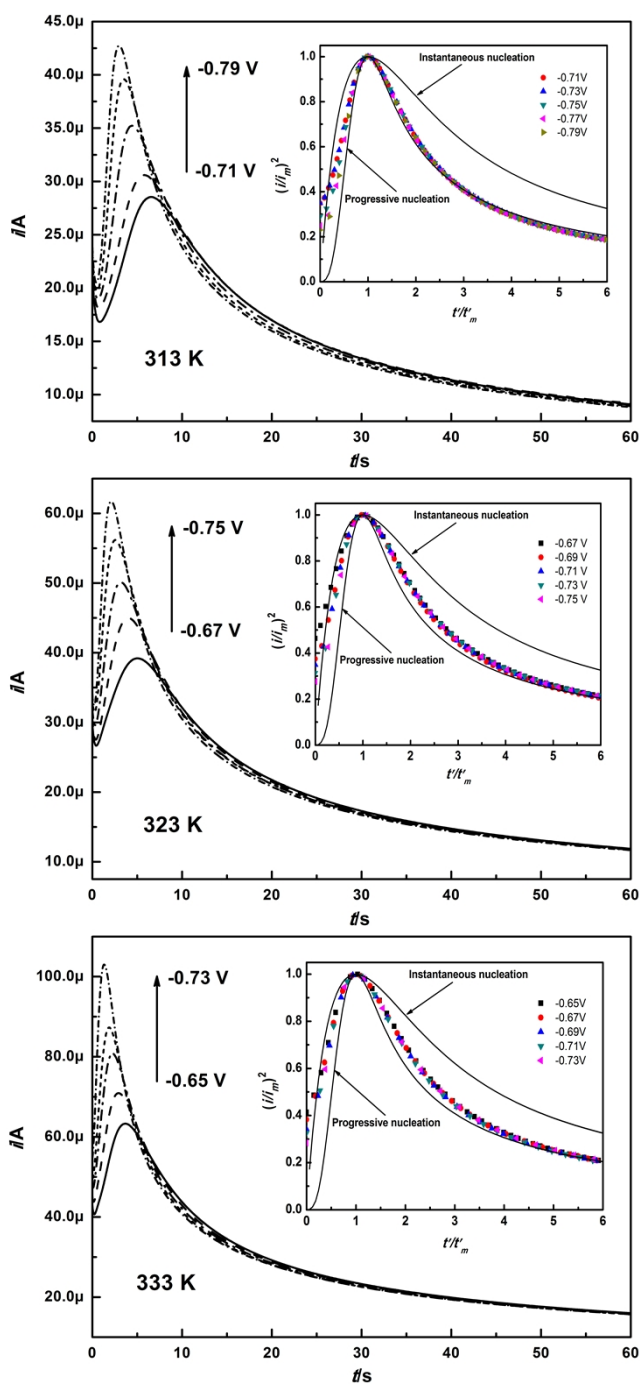

Fig. S2 Current–time transients of the chronoamperometric experiments for the reduction of Cu(I) on a nickel electrode from the DES at various temperatures and different applied potentials (indicated). Insets: Comparison of the dimensionless experimental curves derived from current–time curves with the theoretical models for 3D nucleation/growth process.

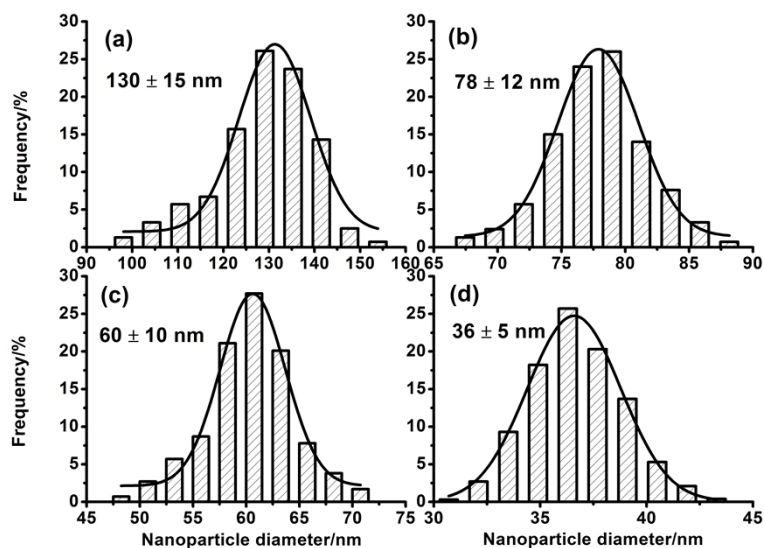

Fig. S3 The corresponding histograms of size distribution of copper nanoparticles measured from SEM images (a)-(d) in Fig. 7.
